# Supplementary material
Source: MDPI journal article supplement (https://www.mdpi.com/2075-163X/10/6/503)
Supplement: s1 [file s1]

# Strain-Induced Fabric Transition of Chlorite and Implications for Seismic Anisotropy in Subduction Zones

Dohyun Kim, Haemyeong Jung \* and Jungjin Lee

Tectonophysics Laboratory, School of Earth and Environmental Sciences, Seoul National University, Seoul 08826, Korea; jet0330@gmail.com (D.K.); ljj2718@snu.ac.kr (J.L.)

\* Correspondence: hjung@snu.ac.kr

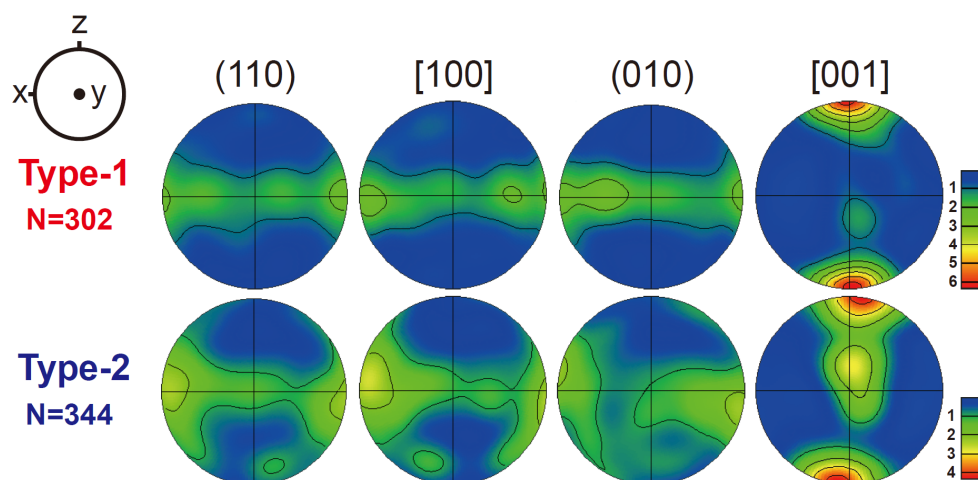

**Figure S1.** Pole figures of chlorite observed in natural samples showing two different types of LPOs [1]. Pole figures are presented in the lower hemisphere using an equal-area projection. N represents the number of grains, and a half-scatter width of  $30^\circ$  was used for the contours. The rounded contours in the pole figure represent the multiples of uniform distributions (m.u.d.), showing a fabric strength. x: lineation direction; z: direction normal to the foliation.

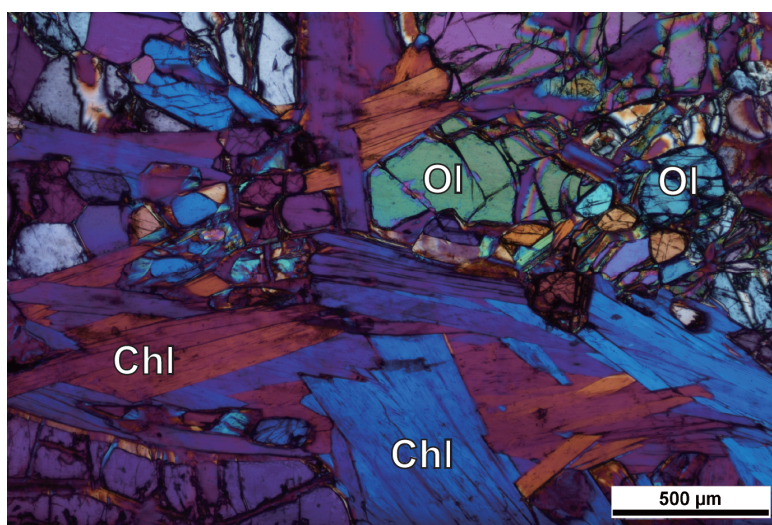

**Figure S2.** Optical photomicrograph of starting material (chlorite peridotite) in cross-polarized light with  $\lambda$  plate inserted. Natural chlorite peridotite from Almklovdaalen, southwest Norway (sample 436 of Kim and Jung [1]) was used for the experiments in this study. Chl: chlorite; Ol: olivine.

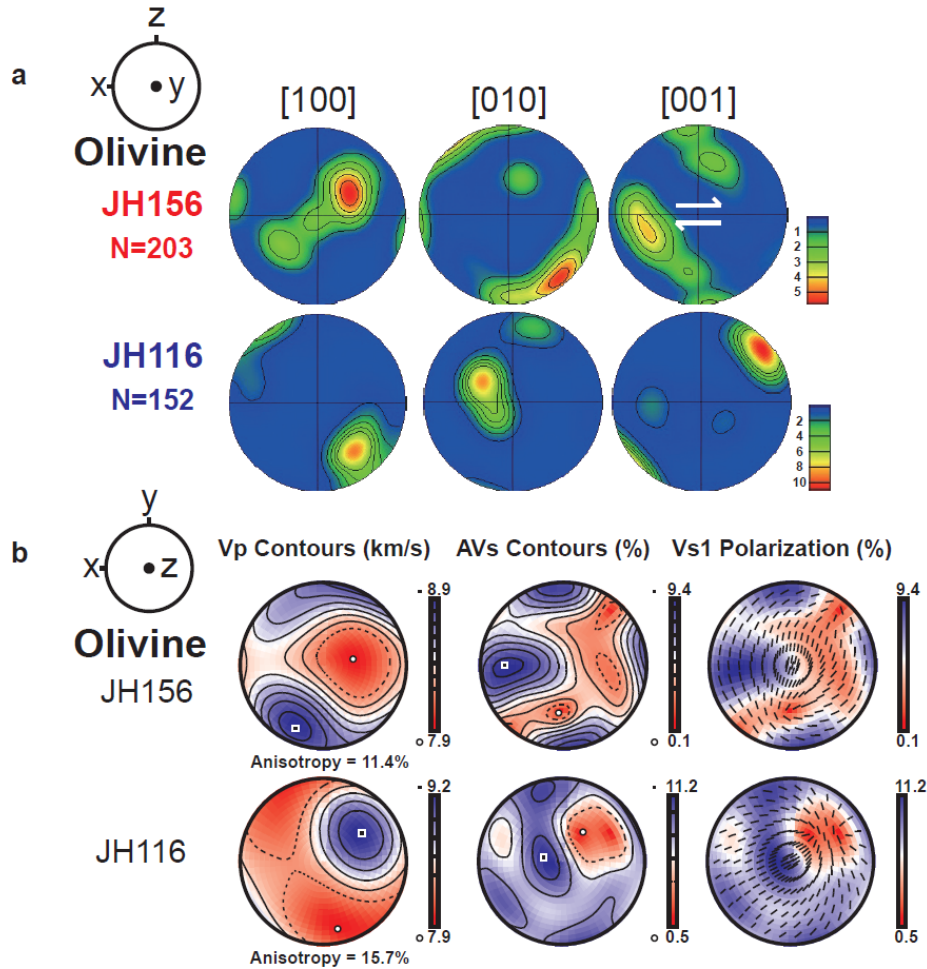

**Figure S3.** Pole figures and seismic anisotropy of experimentally deformed olivine. **(a)** Pole figures of olivine are presented in the lower hemisphere using an equal-area projection. White arrows indicate the dextral direction of shear. Sample JH156 shows a B-type LPO of olivine [2]. N represents the number of grains, and a half-scatter width of 30° was used for the contours. The rounded contours in the pole figure represent the multiples of uniform distributions (m.u.d.), showing a fabric strength. **(b)** Seismic velocity and anisotropy calculated from the LPO of olivine are presented in the lower hemisphere using an equal-area projection. The P-wave velocity ( $V_p$ ), amplitude of the S-wave anisotropy (AVs), and the polarization of the fast S-wave ( $V_{s1}$ ) are plotted. The polarization direction of the vertically propagating fast S-wave ( $V_{s1}$ ) is shown as bars at the center of the stereonet. x: shear direction; z: direction normal to the shear plane.

## References

1. Kim, D.; Jung, H. Deformation microstructures of olivine and chlorite in chlorite peridotites from Almklovdaalen in the Western Gneiss Region, southwest Norway, and implications for seismic anisotropy. *Int. Geol. Rev.* **2015**, *57*, 650–668.
2. Jung, H.; Karato, S.-I. Water-induced fabric transitions in olivine. *Science* **2001**, *293*, 1460–1463.
